# Supplementary material
Source: PubMed Central journal article supplement (PMC6498161)
Supplement: AEM.00334-19-s0001.pdf [file AEM.00334-19-s0001.pdf]

Table S1. Chemical characteristics of soil at day 0

|                         | unamended soil | HTPP amended soil |
|-------------------------|----------------|-------------------|
| pH                      | 6.5±0.1        | 6.9±0.0           |
| <b>moisture %</b>       | 16.4±2.1       | 20.7±1.2          |
| OM LOI %                | 2.7±0.1        | 2.8±0.4           |
| Pa*                     | 477.3±10.7     | 477.3±36.0        |
| P2O5*                   | 1093.1±24.4    | 1289.7±82.5       |
| K*                      | 252.8±8.6      | 671.1±130.9       |
| <b>NH<sub>4</sub>N*</b> | 1.4±0.4        | 30.6±2.2          |
| <b>NO<sub>3</sub>N*</b> | 9.1±0.2        | 2.9±2.3           |
| Total N %               | 0.1±0.0        | 0.2±0             |
| Total C %               | 1.6±0.0        | 2.0±0.2           |
| C:N ratio               | 11.3±0.2       | 10.4±0.7          |
| <b>TOC**</b>            | 116.0±3.1      | 400.8±87.9        |
| Ca*                     | 1218.7±13.3    | 1305.6±48.2       |
| Mg*                     | 117.4±1.4      | 204.8±7.5         |
| Mn*                     | 15.4±0.6       | 34.0±12.2         |
| Zn*                     | 12.1±0.7       | 17.1±0.8          |
| Cu*                     | 3.0±0.1        | 4.7±0.5           |
| Fe*                     | 506.6±5.3      | 488.6±9.0         |
| B*                      | 0.6±0.1        | 1.4±0.4           |
| S*                      | 9.5±0.2        | 150.4±29.0        |
| Na*                     | 6.6±0.5        | 162.4±27.8        |
| Al*                     | 557.1±29.0     | 522.9±2.7         |

\*All nutrients are measured in mg/kg

\*\*TOC is total water extractable carbon

\*\*\* The bolded chemical characteristics were significantly positively corelated with lower  $k_{max}$

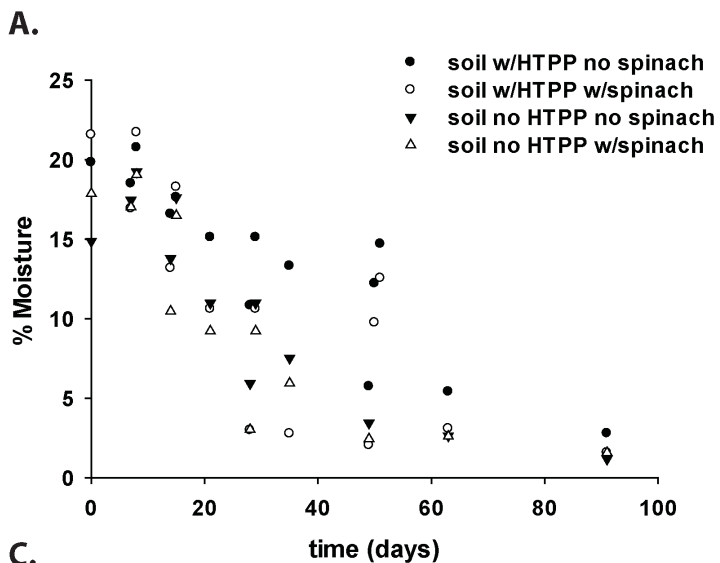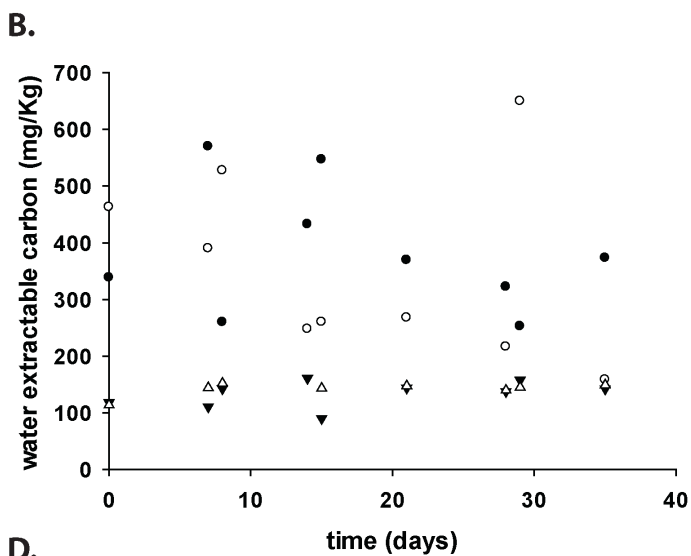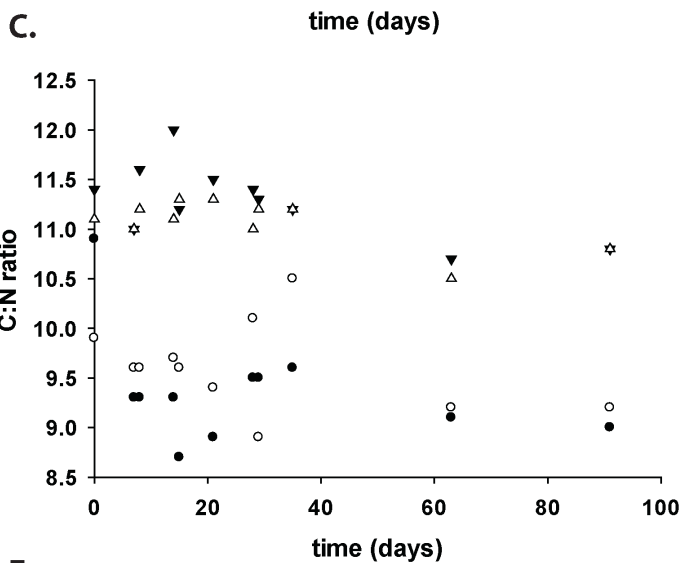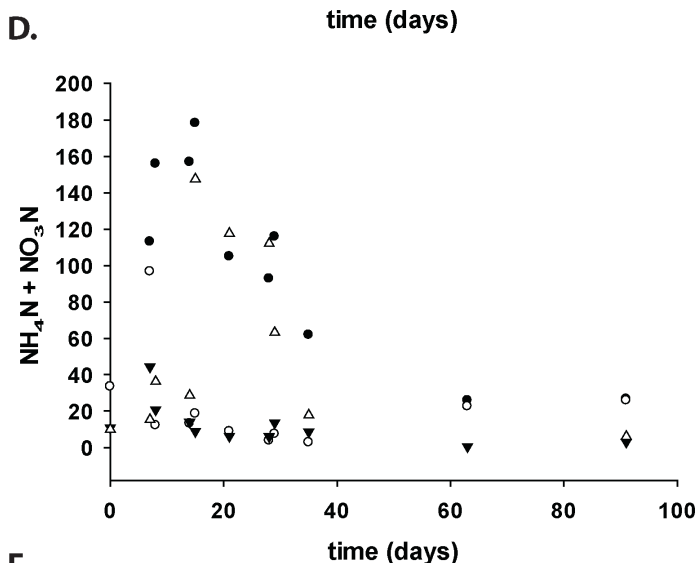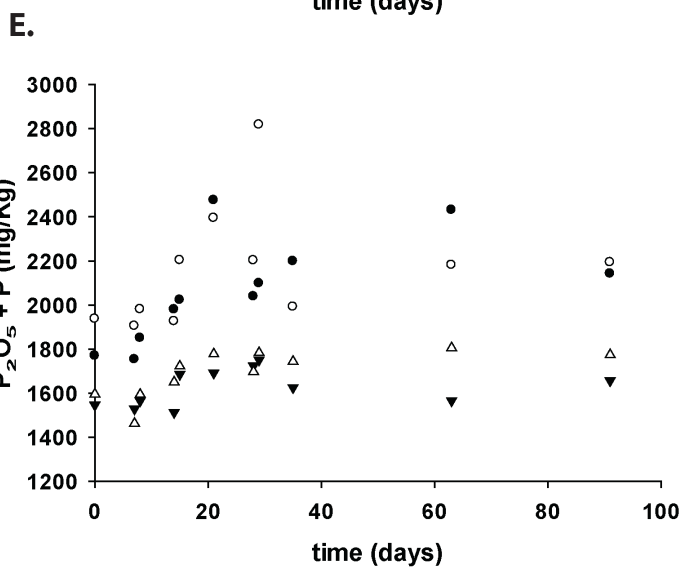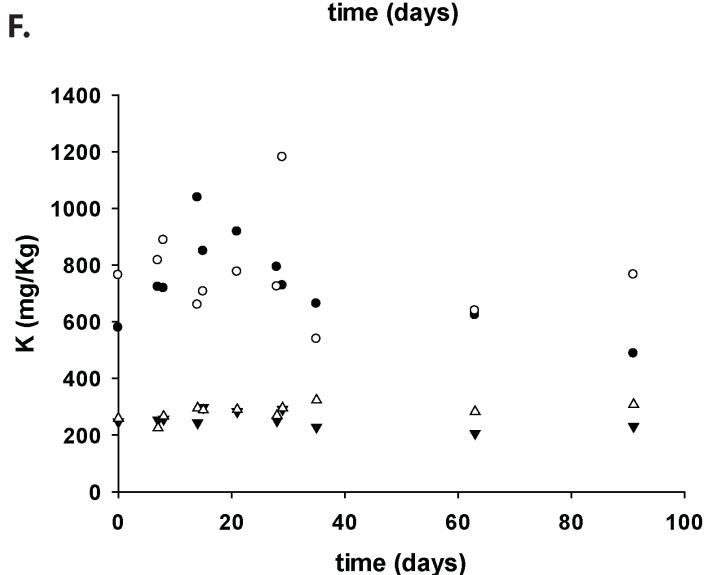

Supplementary Figure 1. Chemical characteristics of soil over time.
